# Supplementary material
Source: ML conference proceedings conference paper supplement (https://openreview.net/forum?id=qac43AwuL9)

| r_y | gamma | lcYdoT | MI_XT  | VI of T and T_ |
|-----|-------|--------|--------|----------------|
| 0.9 | 1     | 0.9094 | 1.5613 | 3.1447         |

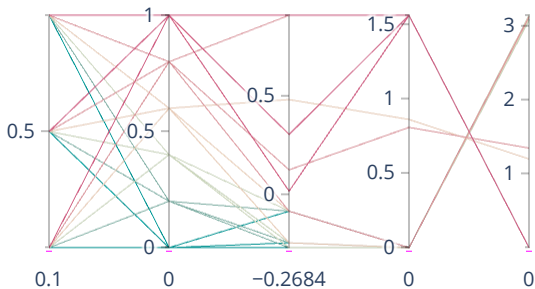

Supplement: supplementary_material [file attachment]

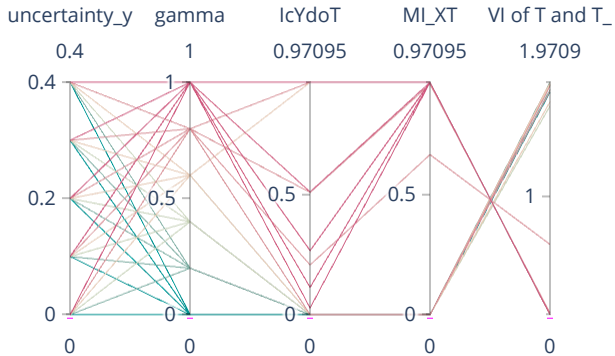

Supplement: supplementary_material [file attachment]

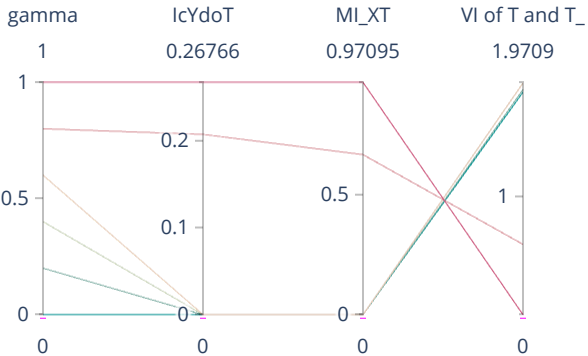

Supplement: supplementary_material [file attachment]

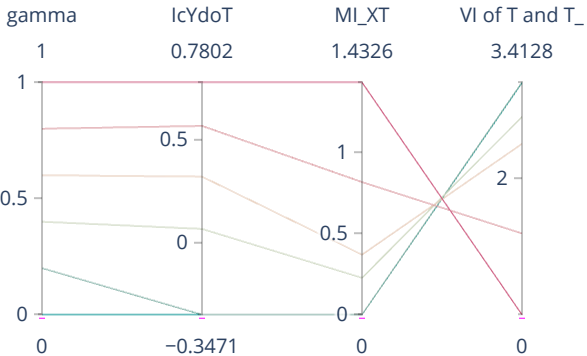

Supplement: supplementary_material [file attachment]

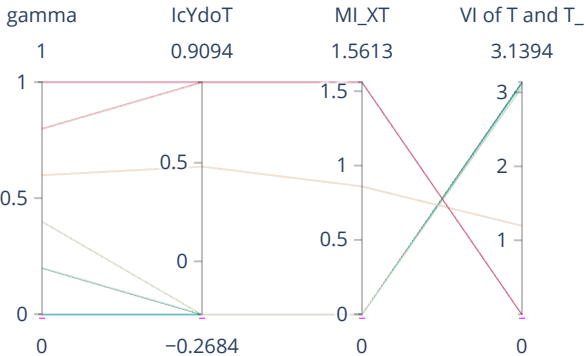

Supplement: supplementary_material [file attachment]

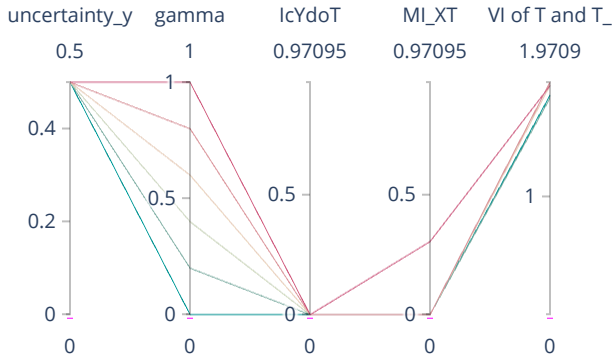

Supplement: supplementary_material [file attachment]

gamma

1

IcYdoT

0.01804

MI\_XT

1.5613

VI of T and T\_

3.1447

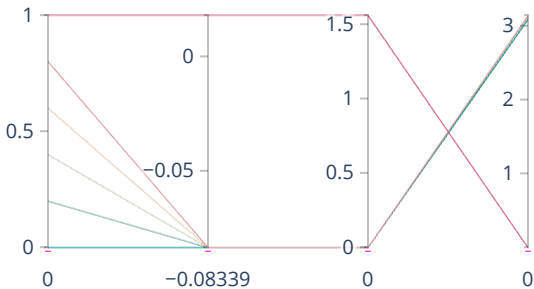

Supplement: supplementary_material [file attachment]

gamma

1

IcYdoT

0.30504

MI\_XT

1.5613

VI of T and T\_

3.1363

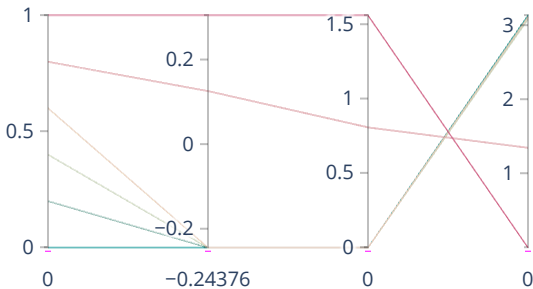

Supplement: supplementary_material [file attachment]
